# Supplementary material for: A comprehensive survey of the prevalence and spatial distribution of ticks infesting cattle in different agro-ecological zones of Cameroon
Source: PubMed Central journal article supplement (PMC6796472; doi:10.1186/s13071-019-3738-7), 2019-10-17
Supplement: 13071_2019_3738_MOESM7_ESM.pdf [file 13071_2019_3738_MOESM7_ESM.pdf]

*Rhipicephalus decoloratus*

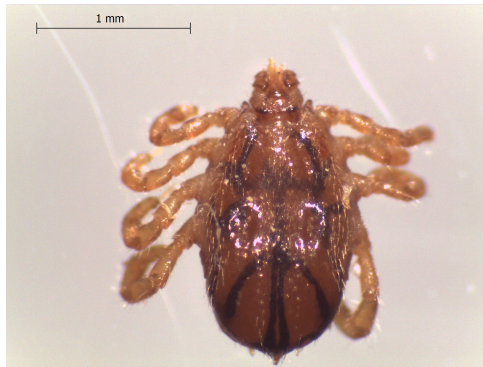

**Adult male, dorsal**

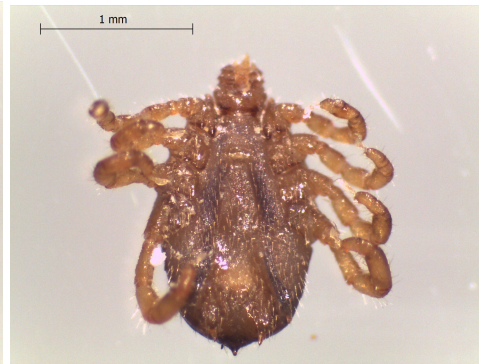

**Adult male, ventral**

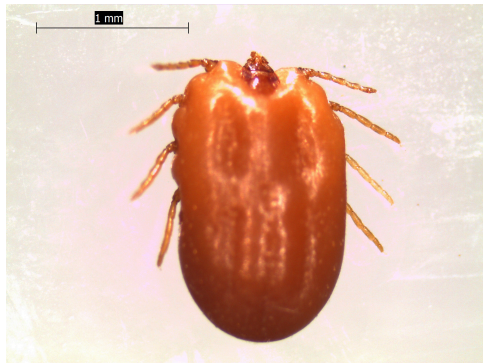

**Adult female, dorsal**

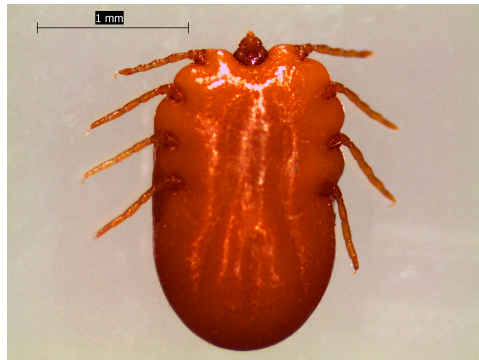

**Adult female, ventral**

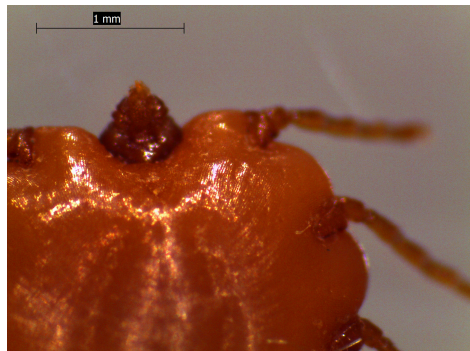

**Adult female, genital aperture**

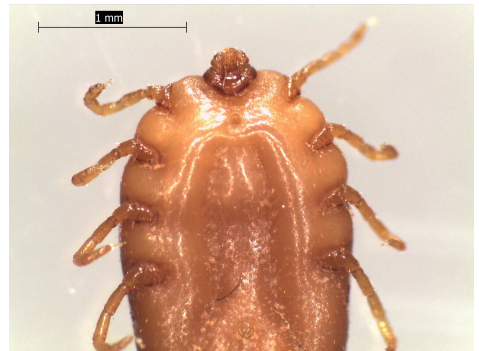

**Adult female, coxae 2 and 3  
spurs are present**
